# Supplementary material for: Guided Genioplasty: Comparison between Conventional Technique and Customized Guided Surgery
Source: MDPI journal article supplement (doi:10.3390/jpm13121702), 2023-12-12
Supplement: s1 [file s1]

**Table S1.** Patients treated by customized guided surgery.

| Guided surgery | Age (y) | Sex   | Advance<br>pre. (mm.) | Retrusion<br>pre. (mm.) | Midline change<br>pre. (mm.) | Midline change<br>post. (mm.) | Surgical<br>time (min.) |
|----------------|---------|-------|-----------------------|-------------------------|------------------------------|-------------------------------|-------------------------|
| Patient 1      | 34      | Woman | 5                     |                         |                              | 5.1                           | 38                      |
| Patient 2      | 35      | Man   | 5                     |                         |                              | 5                             | 34                      |
| Patient 3      | 18      | Woman | 7                     |                         |                              | 6.8                           | 43                      |
| Patient 4      | 24      | Woman | 7                     |                         |                              | 6.9                           | 46                      |
| Patient 5      | 22      | Man   | 3                     |                         |                              | 3                             | 55                      |
| Patient 6      | 48      | Woman | 5                     |                         |                              | 5                             | 40                      |
| Patient 7      | 20      | Woman | 4                     |                         |                              | 4                             | 39                      |
| Patient 8      | 23      | Woman | 5                     |                         |                              | 5.2                           | 40                      |
| Patient 9      | 27      | Man   | 7                     |                         |                              | 7.1                           | 51                      |
| Patient 10     | 27      | Woman | 5                     |                         |                              | 5.2                           | 35                      |
| Patient 11     | 30      | Woman | 5                     |                         |                              | 5                             | 27                      |
| Patient 12     | 25      | Man   | 7                     |                         |                              | 7                             | 41                      |
| Patient 13     | 40      | Woman | 5                     |                         |                              | 5                             | 36                      |
| Patient 14     | 41      | Woman |                       |                         | 15 <sup>o</sup>              | 16 <sup>o</sup>               | 48                      |
| Patient 15     | 37      | Woman |                       |                         | 14 <sup>o</sup>              | 14 <sup>o</sup>               | 51                      |
| Patient 16     | 21      | Woman |                       |                         | 10 <sup>o</sup>              | 11 <sup>o</sup>               | 45                      |
| Patient 17     | 25      | Woman |                       |                         | 16 <sup>o</sup>              | 16 <sup>o</sup>               | 46                      |
| Patient 18     | 29      | Woman |                       |                         | 20 <sup>o</sup>              | 21 <sup>o</sup>               | 42                      |
| Patient 19     | 40      | Woman |                       |                         | 18 <sup>o</sup>              | 18 <sup>o</sup>               | 48                      |
| Patient 20     | 51      | Woman |                       | 3                       |                              | 3.4                           | 42                      |
| Patient 21     | 28      | Woman |                       | 4                       |                              | 4                             | 50                      |
| Patient 22     | 39      | Woman |                       | 3                       |                              | 3.1                           | 46                      |
| Patient 23     | 37      | Woman |                       | 5                       |                              | 5.1                           | 35                      |
| Patient 24     | 28      | Woman |                       | 5                       |                              | 5                             | 40                      |
| Patient 25     | 37      | Woman |                       | 3                       |                              | 3                             | 38                      |

**Table S2.** Patients treated by conventional surgery.

| Conventional<br>surgery | Age (y) | Sex   | Advance<br>pre. (mm.) | Retrusion<br>pre. (mm.) | Midline change<br>pre. (mm.) | Midline change<br>post. (mm.) | Surgical<br>time (min.) |
|-------------------------|---------|-------|-----------------------|-------------------------|------------------------------|-------------------------------|-------------------------|
| Patient 1               | 19      | Woman | 5                     |                         |                              | 5.2                           | 46                      |
| Patient 2               | 34      | Man   | 7                     |                         |                              | 6.8                           | 45                      |
| Patient 3               | 19      | Woman | 6                     |                         |                              | 6.2                           | 47                      |
| Patient 4               | 28      | Woman | 3                     |                         |                              | 3.2                           | 58                      |
| Patient 5               | 38      | Woman | 5                     |                         |                              | 5.3                           | 62                      |
| Patient 6               | 35      | Woman | 5                     |                         |                              | 5                             | 69                      |
| Patient 7               | 30      | Woman | 6                     |                         |                              | 5.8                           | 57                      |
| Patient 8               | 21      | Woman |                       | 3                       |                              | 3.1                           | 49                      |
| Patient 9               | 49      | Man   |                       | 5                       |                              | 5.2                           | 55                      |
| Patient 10              | 45      | Woman |                       | 4                       |                              | 4.3                           | 54                      |
| Patient 11              | 39      | Woman |                       | 5                       |                              | 4                             | 55                      |
| Patient 12              | 37      | Woman |                       | 3                       |                              | 3                             | 67                      |
| Patient 13              | 23      | Woman |                       | 5                       |                              | 5.2                           | 54                      |
| Patient 14              | 20      | Woman |                       |                         | 15 <sup>o</sup>              | 17 <sup>o</sup>               | 87                      |
| Patient 15              | 18      | Woman |                       |                         | 14 <sup>o</sup>              | 18 <sup>o</sup>               | 61                      |
| Patient 16              | 21      | Woman |                       |                         | 22 <sup>o</sup>              | 25 <sup>o</sup>               | 107                     |
| Patient 17              | 22      | Woman |                       |                         | 21 <sup>o</sup>              | 22 <sup>o</sup>               | 45                      |
| Patient 18              | 24      | Woman |                       |                         | 19 <sup>o</sup>              | 22 <sup>o</sup>               | 68                      |
